# Supplementary material for: H7N9 virulent mutants detected in chickens in China pose an increased threat to humans
Source: PubMed Central journal article supplement (PMC5717404; doi:10.1038/cr.2017.129), 2017-10-24
Supplement: cr2017129x1.pdf [file cr2017129x1.pdf]

Figure S1

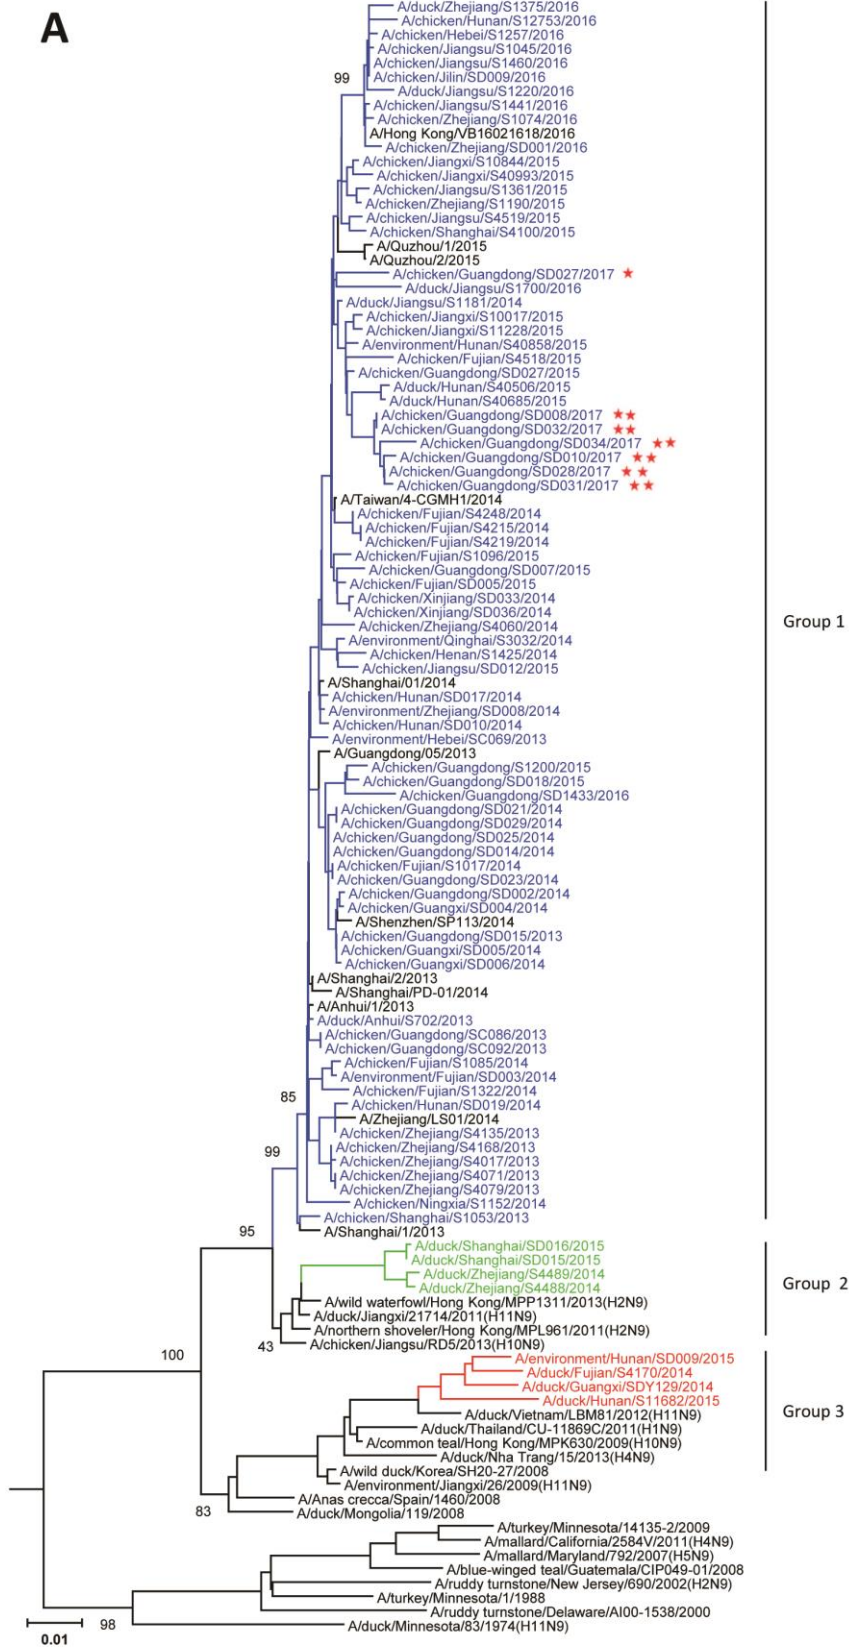

**B**

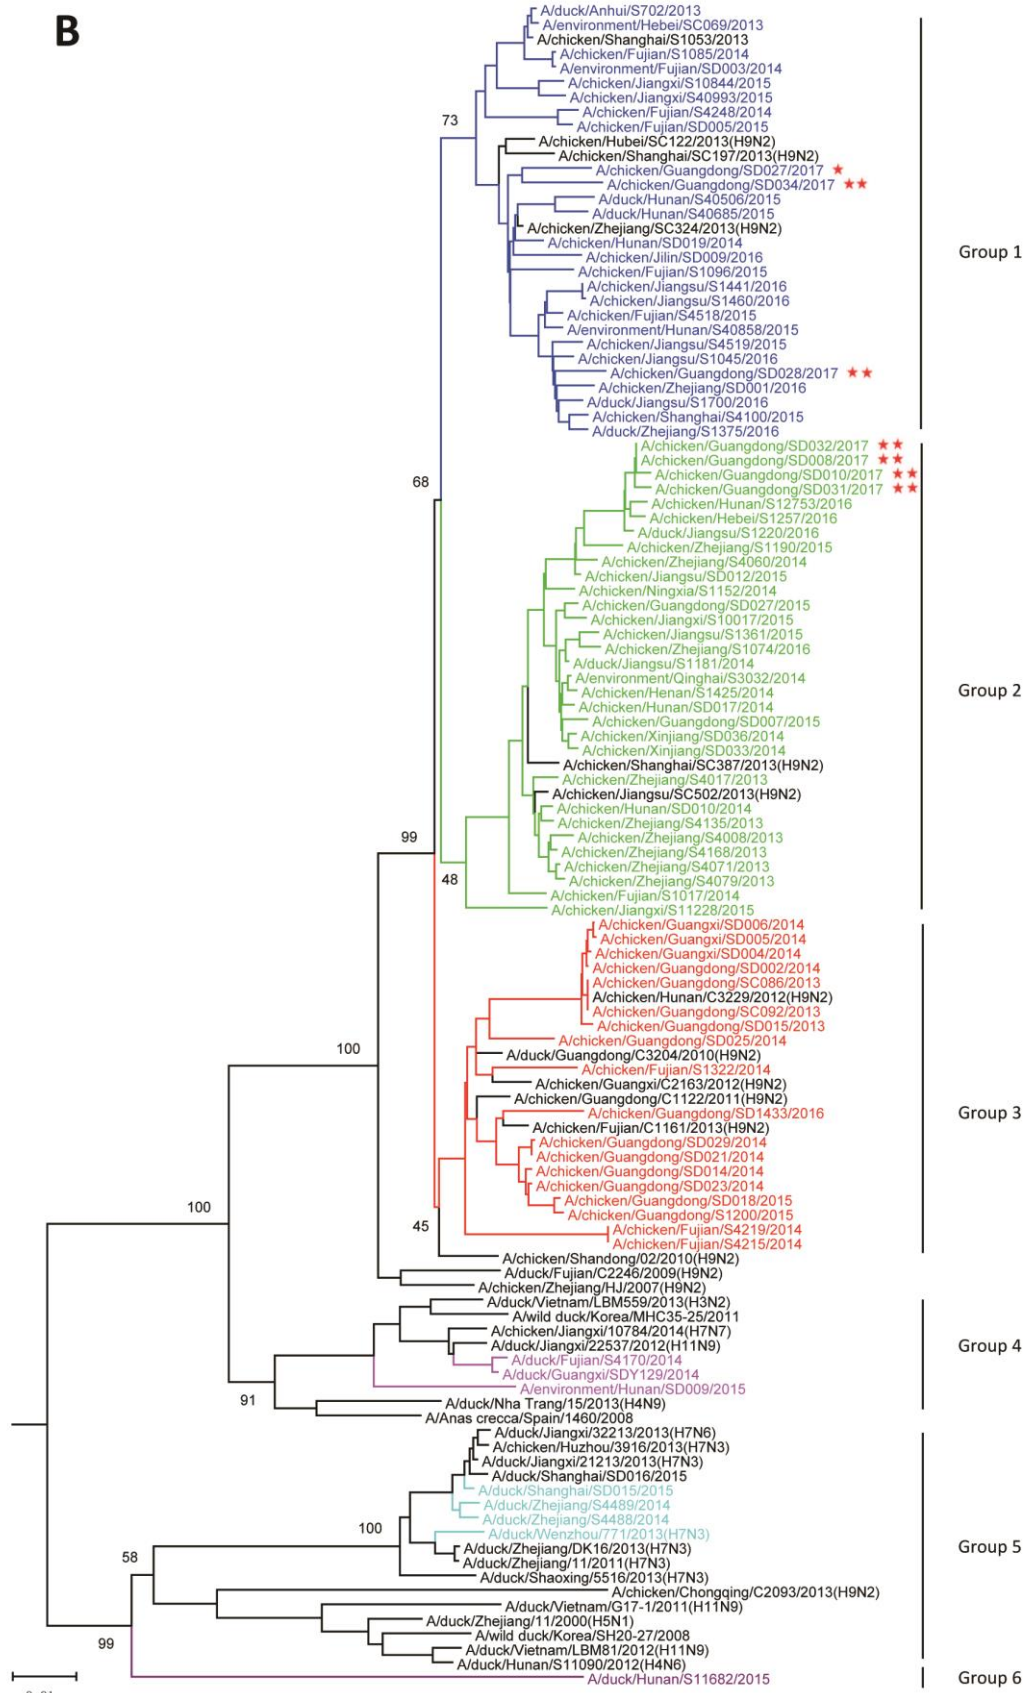

C

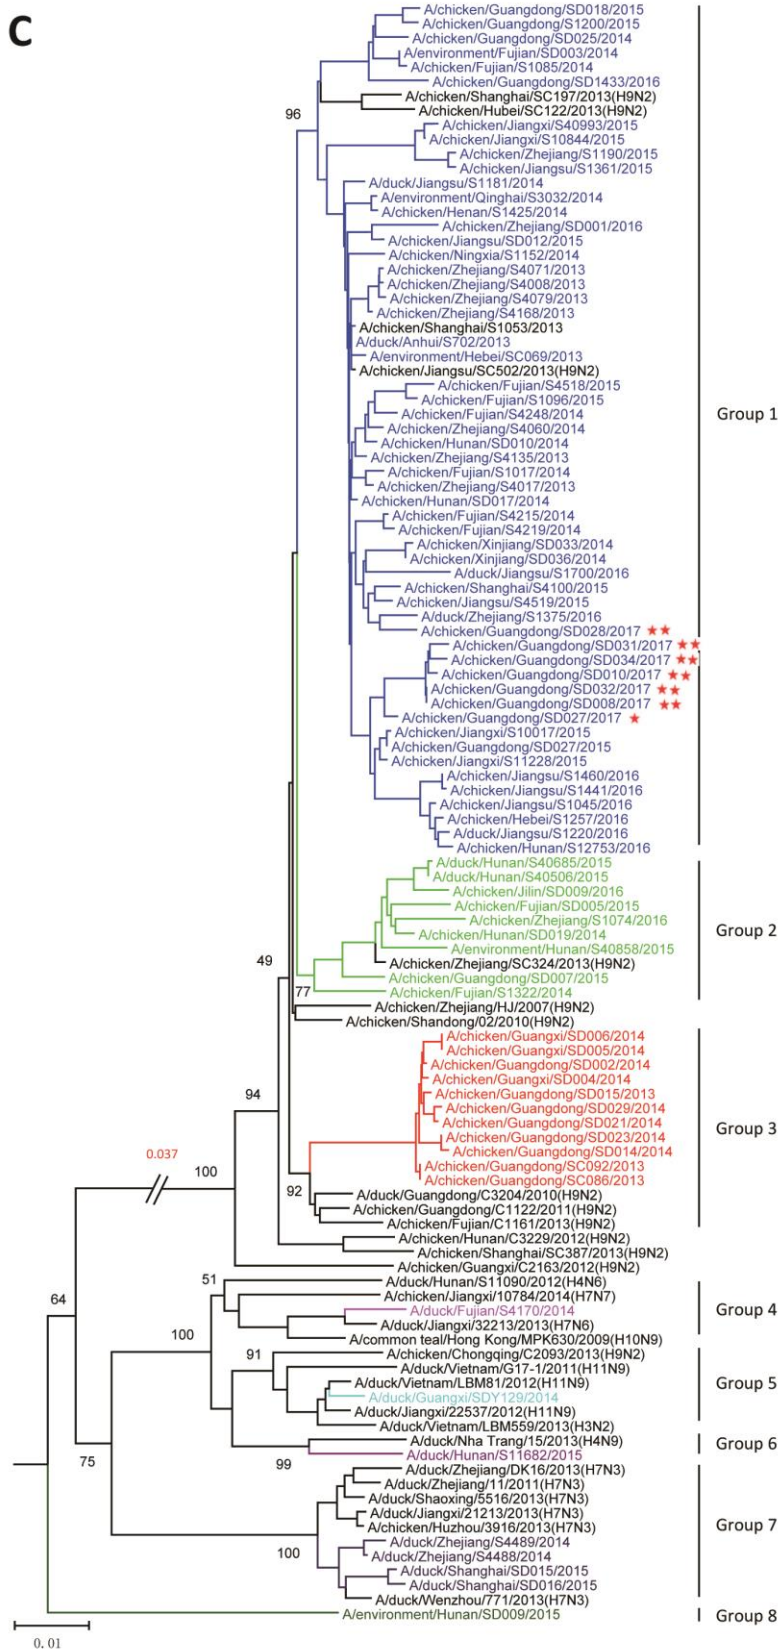

D

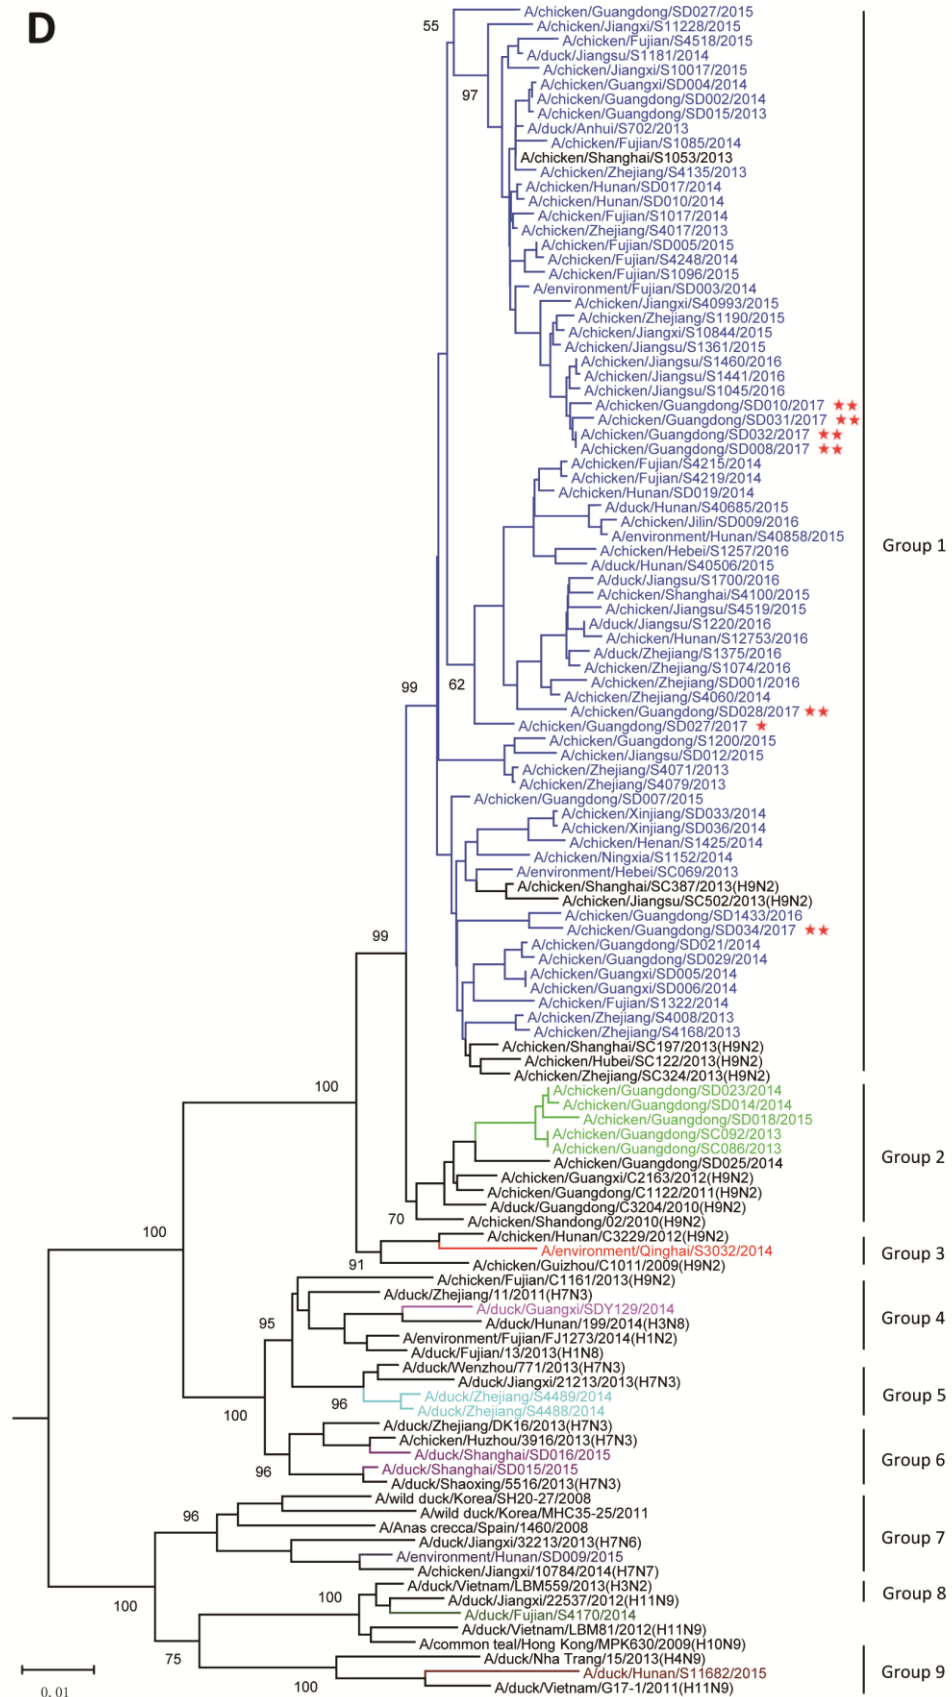



E

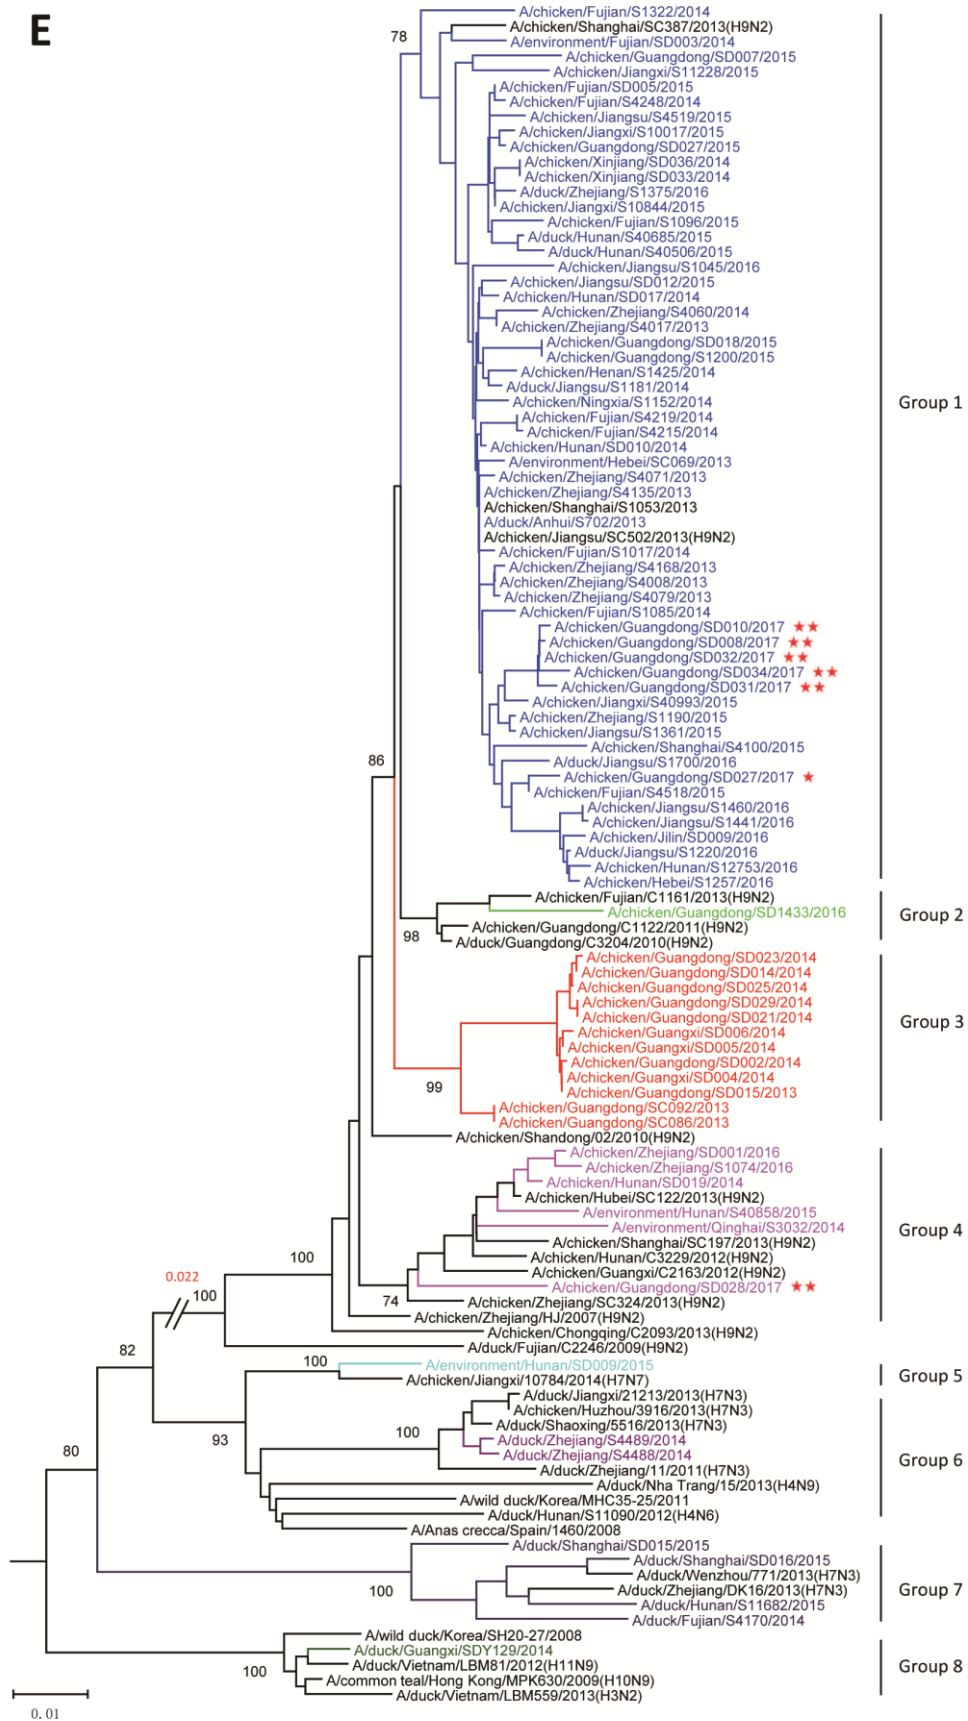

F

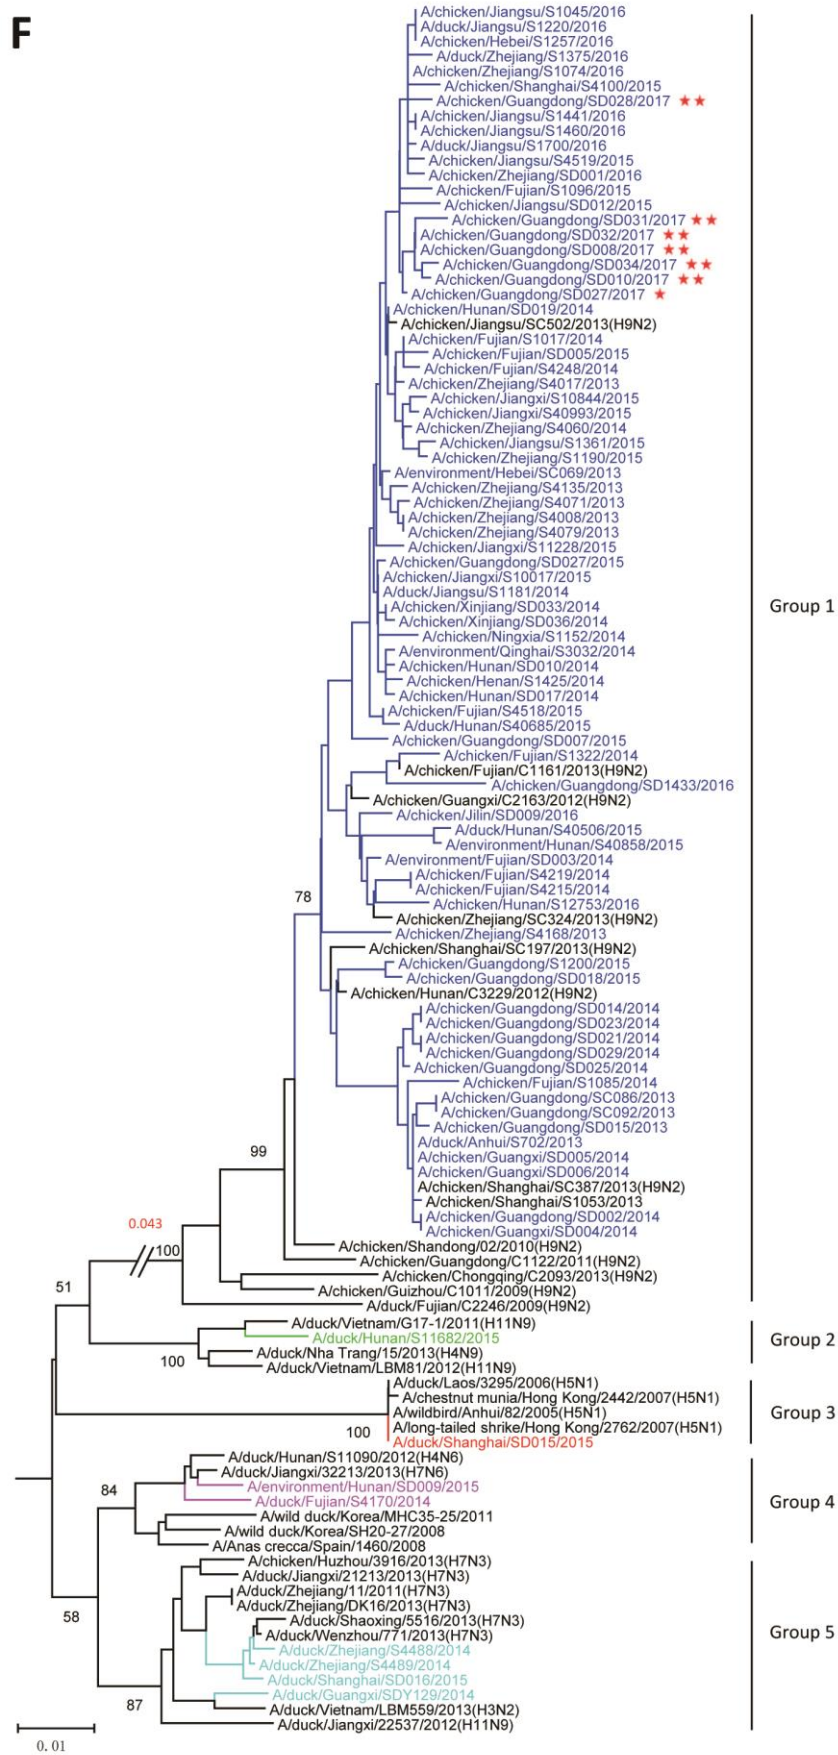

G

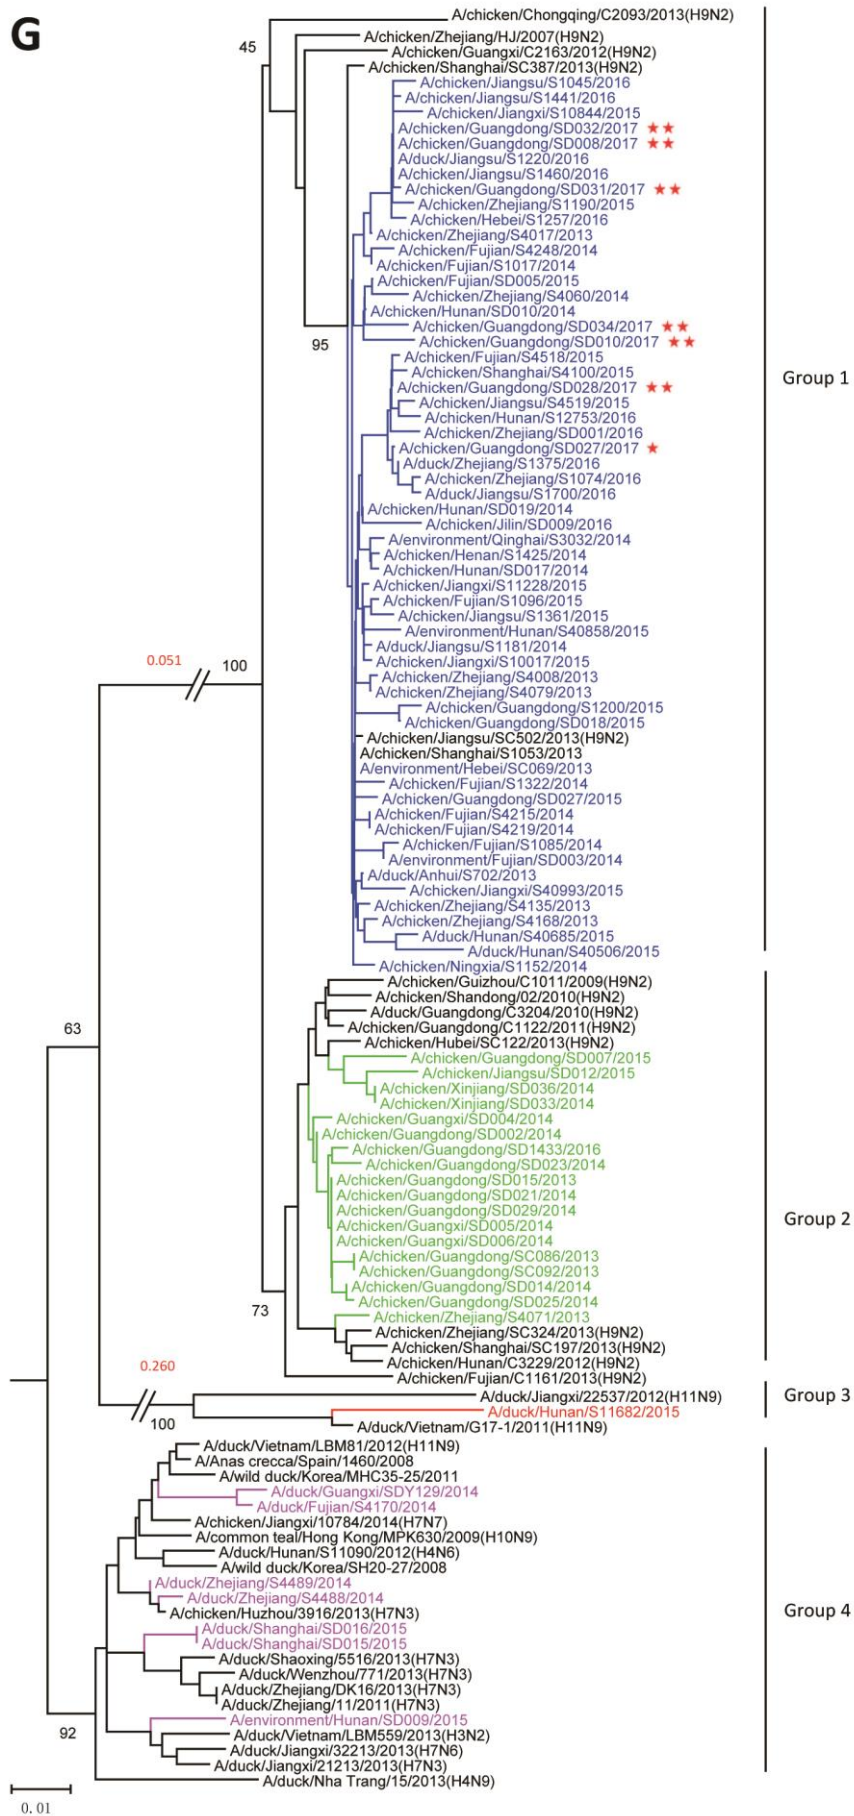

**Figure S1. Phylogenetic trees of the NA and internal genes of H7N9 influenza viruses.**

(A) Phylogenetic tree of NA. The tree was rooted to A/chicken/Italy/22A/1998(H5N9) virus and based on nucleotides (nt) 19 to 1416. The phylogenetic trees of PB2 (B), PB1(C), PA (D), NP (E), M (F), and NS (G) were based on nt 28–2307, 25–2298, 25–2175, 46–1542, 26–1007, and 27–864, respectively, and rooted to A/chicken/Rostock/45/1934(H7N1) virus. Sequences of viruses with names in black were downloaded from available databases; viruses with names in colors were sequenced in this study. Viruses labelled with stars contain the four amino acid (-KRTA-) insertion in their HA gene cleavage sites.
