# Supplementary material for: H7N9 virulent mutants detected in chickens in China pose an increased threat to humans
Source: PubMed Central journal article supplement (PMC5717404; doi:10.1038/cr.2017.129), 2017-10-24
Supplement: cr2017129x2.pdf [file cr2017129x2.pdf]

Figure S2

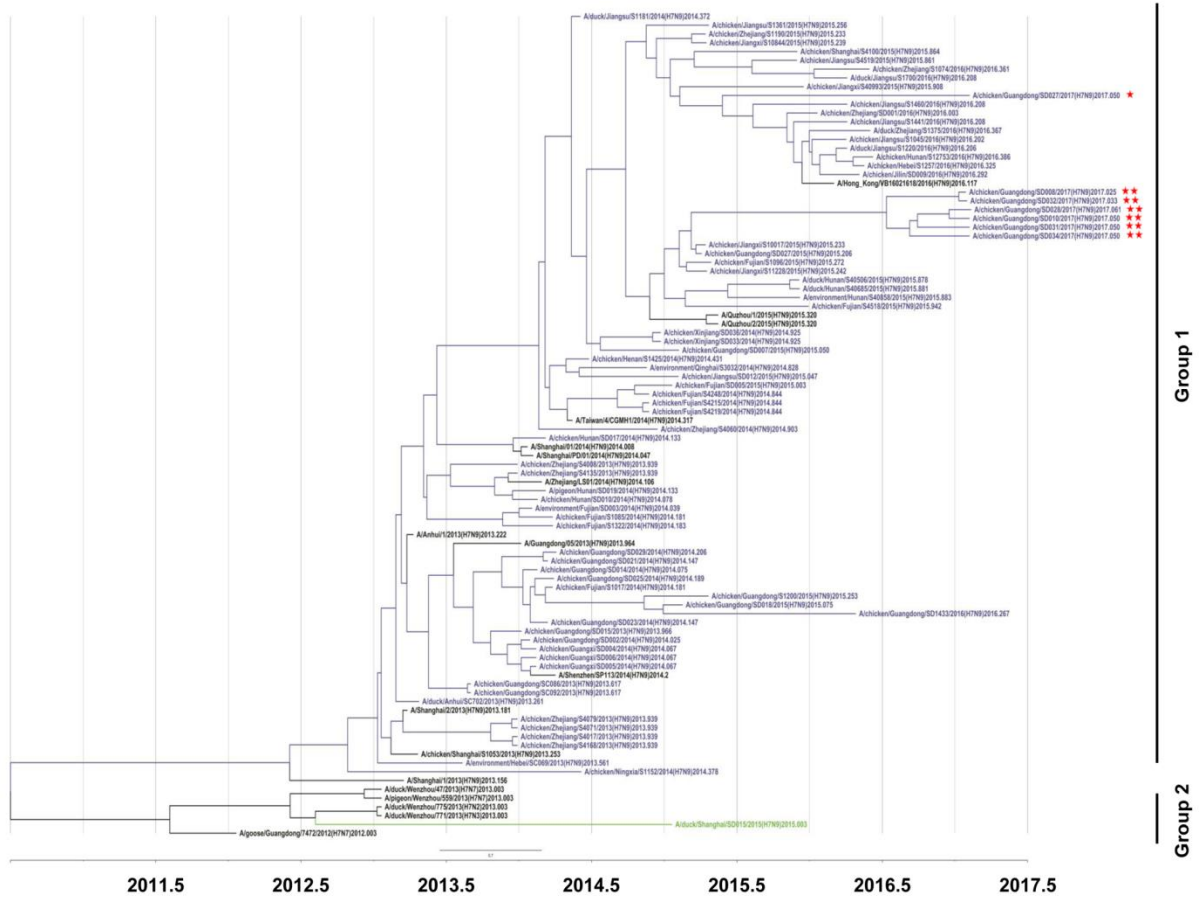

**Figure S2. Bayesian time-resolved phylogenetic tree of the HA gene of H7N9 viruses.** The tree was created using BEAST 1.8 with the SRD06 nucleotide substitution model, an uncorrelated relaxed clock with a log-normal distribution, and skygrid flexible effective population size tree prior. The tree was viewed in Figtree 1.4.3.
