# Supplementary material for: H7N9 virulent mutants detected in chickens in China pose an increased threat to humans
Source: PubMed Central journal article supplement (PMC5717404; doi:10.1038/cr.2017.129), 2017-10-24
Supplement: cr2017129x3.pdf [file cr2017129x3.pdf]

Figure S3

A

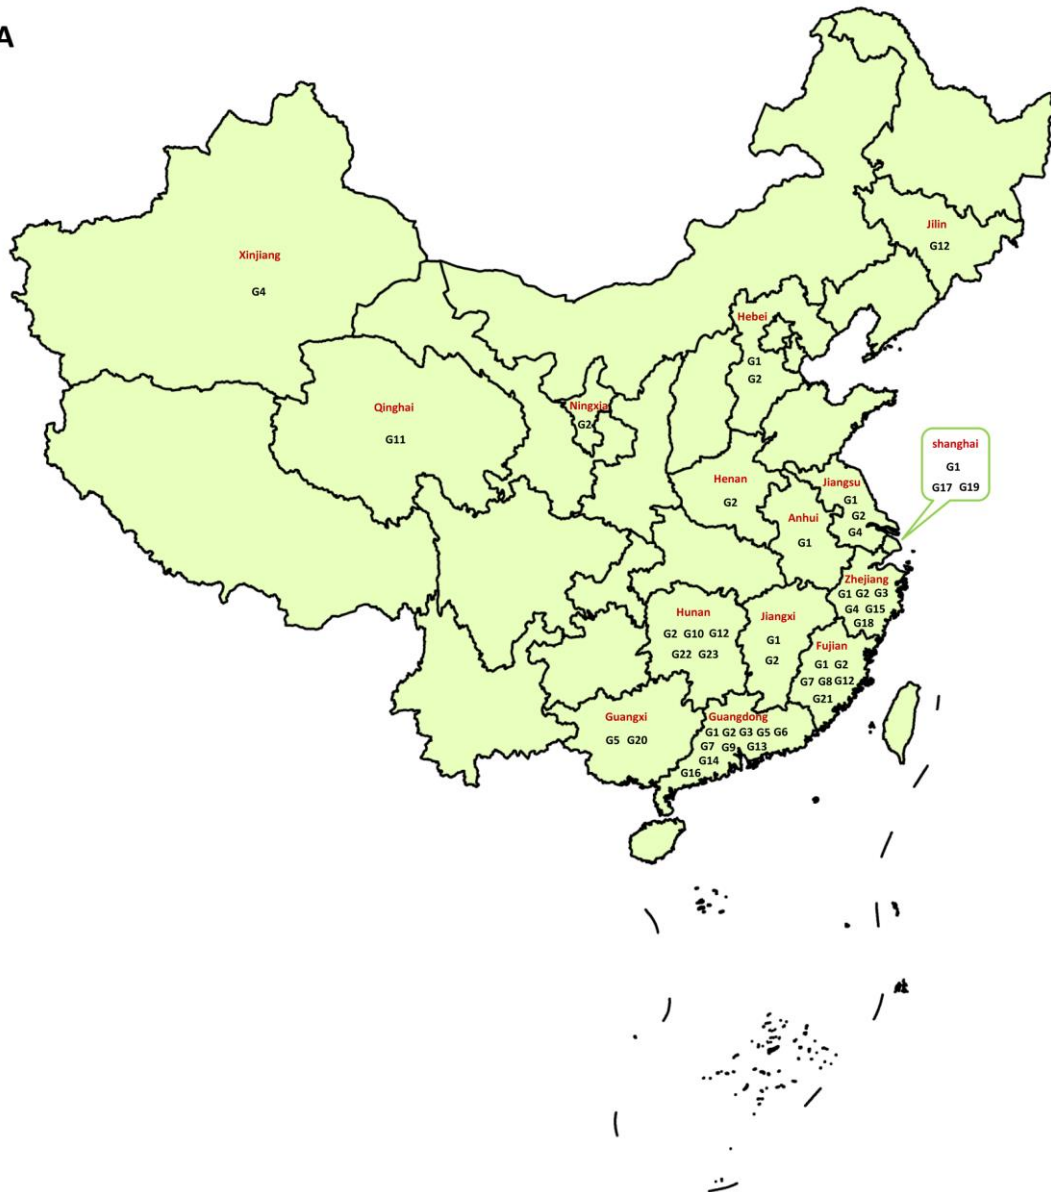

B

| Year | Genotype                                                |
|------|---------------------------------------------------------|
| 2013 | G1, G2, G4, G5, G6                                      |
| 2014 | G1, G2, G4, G5, G6, G7, G8, G9, G10, G11, G18, G20, G21 |
| 2015 | G1, G2, G4, G7, G10, G12, G13, G14, G17, G19, G22, G23  |
| 2016 | G1, G2, G3, G12, G15, G16                               |
| 2017 | G1, G2, G3                                              |

Figure S3. Geographic and temporal distribution of the different genotypes of H7N9 influenza viruses detected in this study.
