# Supplementary material for: H7N9 virulent mutants detected in chickens in China pose an increased threat to humans
Source: PubMed Central journal article supplement (PMC5717404; doi:10.1038/cr.2017.129), 2017-10-24
Supplement: cr2017129x4.pdf [file cr2017129x4.pdf]

**Figure S4**

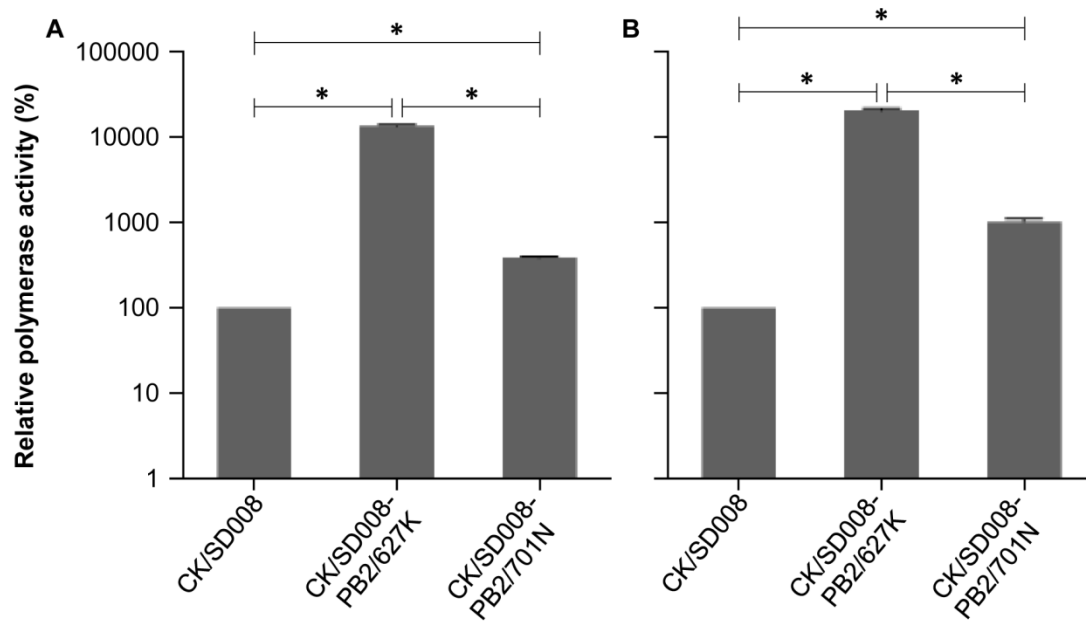

**Figure S4. Polymerase activities of CK/SD008 and its PB2 mutants.** 293T cells were transfected with plasmids containing PB2, PB1, PA, and NP genes of the indicated virus plus a firefly luciferase reporter plasmid. After transfection, the 293T cells were cultured at 33 °C (A) and 37 °C (B) for 24 h. Results are the averages from three independent experiments and are shown as the fold increase over the CK/SD008 virus value (100%). The values were statistically analyzed by using a two-tailed paired *t* test. \*,  $p < 0.01$ .
