# Supplementary material for: H7N9 virulent mutants detected in chickens in China pose an increased threat to humans
Source: PubMed Central journal article supplement (PMC5717404; doi:10.1038/cr.2017.129), 2017-10-24
Supplement: cr2017129x6.pdf [file cr2017129x6.pdf]

**Figure S6**

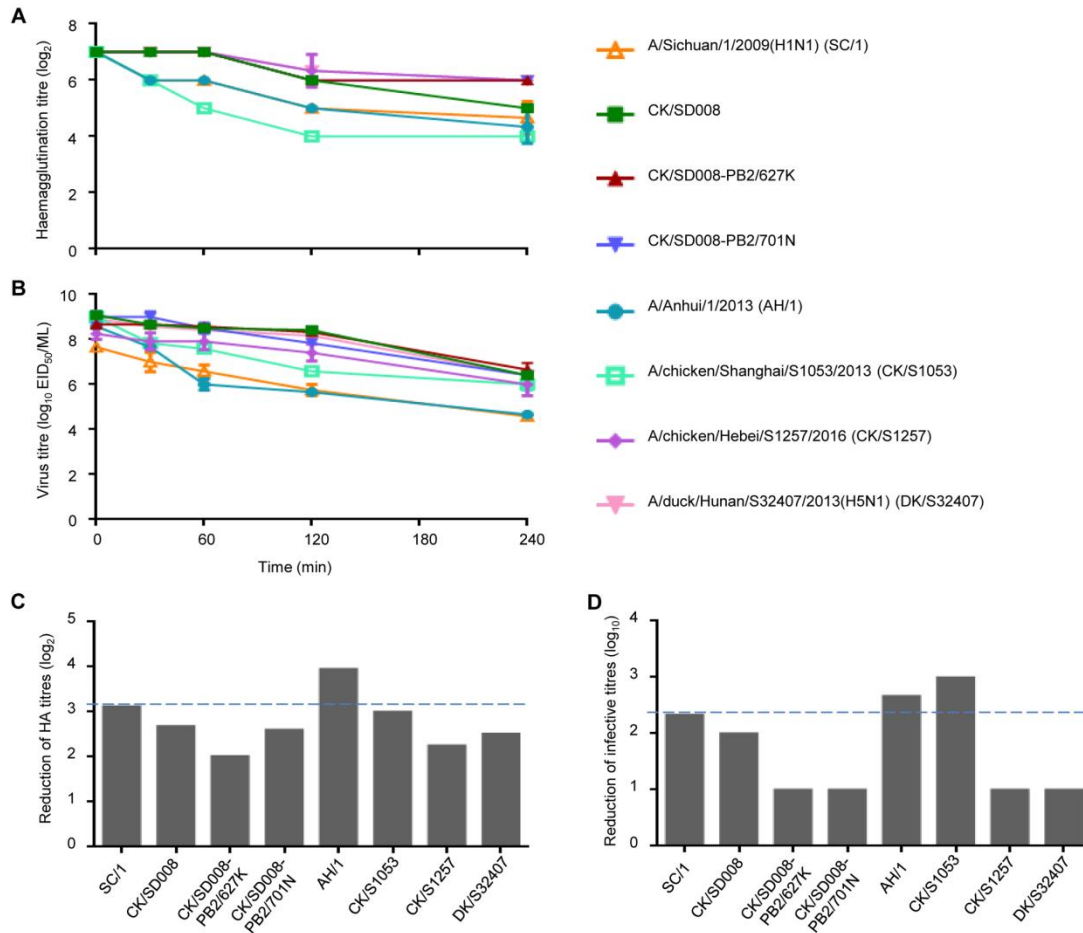

**Figure S6. Effect of heat-treatment on the hemagglutination activity and infectivity of influenza viruses.** Aliquots of viruses containing 128 HA units were incubated for the times indicated at 50 °C. **A.** Hemagglutination titers in heat-treated samples were determined by using hemagglutination assay with 0.5% chicken red blood cells. **B.** Virus infectivity of heat-treated samples was determined in chicken eggs. Each point represents the mean  $\pm$  standard deviation of triplicate experiments. **C.** Reduction in HA titers of each virus after 240 minutes of heat treatment. **D.** Reduction in viral infectivity of each virus after 240 minutes of heat treatment. The dashed lines indicate the reduced titer of human SC/1 virus after heat treatment for comparison.
