# Supplementary material for: H7N9 virulent mutants detected in chickens in China pose an increased threat to humans
Source: PubMed Central journal article supplement (PMC5717404; doi:10.1038/cr.2017.129), 2017-10-24
Supplement: cr2017129x7.pdf [file cr2017129x7.pdf]

**Table S1. Details of samples collected for H7N9 influenza virus isolation from July 2013 to January 2017<sup>a</sup>.**

| Province or city | Sampling site   | Samples collected (number of H7N9 viruses/number of total influenza viruses isolated) |               |               |                |                |               |                |               |               |               |               |               |                |      |              | Total             |
|------------------|-----------------|---------------------------------------------------------------------------------------|---------------|---------------|----------------|----------------|---------------|----------------|---------------|---------------|---------------|---------------|---------------|----------------|------|--------------|-------------------|
|                  |                 | 2013                                                                                  |               |               | 2014           |                |               | 2015           |               |               | 2016          |               |               | 2017           |      |              |                   |
|                  |                 | Chicken                                                                               | Duck          | Environ-ment  | Chicken        | Duck           | Environ-ment  | Chicken        | Duck          | Environ-ment  | Chicken       | Duck          | Environ-ment  | Chicken        | Duck | Environ-ment |                   |
| Anhui            | Poultry market  | 196<br>(0/15)                                                                         | 19<br>(0/2)   | 145<br>(0/6)  | 300<br>(0/3)   | 141<br>(0/19)  | 138<br>(0/11) | 390<br>(5/16)  | 171<br>(2/27) | 90<br>(0/5)   | 310<br>(3/19) | 176<br>(2/34) | 2<br>(0/1)    |                |      |              | 2,078<br>(12/158) |
|                  | Farm            |                                                                                       |               |               | 410            | 10             | 40            | 180<br>(0/1)   | 133           |               | 270<br>(0/1)  |               |               |                |      |              | 1,043<br>(0/2)    |
| Chong-qing       | Poultry market  | 230<br>(0/9)                                                                          | 70<br>(0/9)   | 15            | 394<br>(0/17)  | 168<br>(0/23)  | 43<br>(0/3)   | 239<br>(0/20)  | 207<br>(0/24) | 32<br>(0/8)   | 468<br>(0/18) | 341<br>(0/38) | 1<br>(0/1)    |                |      |              | 2,208<br>(0/170)  |
|                  | Farm            |                                                                                       |               |               | 216<br>(0/2)   | 82<br>(0/2)    | 18            | 330            | 30<br>(0/1)   | 10<br>(0/1)   |               |               |               |                |      |              | 686<br>(0/6)      |
| Fujian           | Poultry market  | 110<br>(0/6)                                                                          | 110<br>(0/12) | 80<br>(0/12)  | 220<br>(4/5)   | 280<br>(1/19)  | 60<br>(1/5)   | 300<br>(4/10)  | 269<br>(0/30) | 60<br>(2/14)  | 350<br>(4/17) | 308<br>(0/28) | 40<br>(0/4)   |                |      |              | 2,187<br>(16/162) |
|                  | Farm            |                                                                                       |               |               | 30             | 120            | 10<br>(1/1)   |                |               |               |               |               |               |                |      |              | 160<br>(1/1)      |
| Guang-dong       | Poultry market  | 390<br>(4/9)                                                                          | 220<br>(0/14) | 208<br>(0/7)  | 299<br>(11/31) | 184<br>(0/24)  | 160<br>(0/15) | 596<br>(34/67) | 264<br>(0/32) | 157<br>(0/15) | 490<br>(7/27) | 300<br>(1/28) | 130<br>(0/12) | 630<br>(31/51) |      |              | 4,028<br>(88/332) |
|                  | Farm            | 140<br>(0/10)                                                                         |               |               | 219<br>(1/2)   | 43             |               | 85<br>(1/3)    | 30            |               | 30<br>(1/1)   |               |               |                |      |              | 547<br>(3/16)     |
| Guangxi          | Poultry market  | 380<br>(0/23)                                                                         | 260<br>(0/25) | 100<br>(0/13) | 897<br>(4/34)  | 1157<br>(0/82) | 368<br>(0/22) | 648<br>(0/34)  | 718<br>(0/92) | 183<br>(0/26) | 755<br>(0/29) | 923<br>(0/98) | 328<br>(0/35) |                |      |              | 6,717<br>(4/513)  |
|                  | Farm            | 30                                                                                    | 150<br>(0/1)  |               | 310<br>(0/2)   | 494<br>(0/8)   | 10            | 430<br>(0/5)   | 470<br>(0/6)  | 20            | 480<br>(0/1)  | 540<br>(0/12) |               |                |      |              | 2,934<br>(0/35)   |
| Guizhou          | Poultry market  | 330<br>(0/21)                                                                         | 60<br>(0/8)   | 90<br>(0/12)  | 491<br>(0/37)  | 86<br>(0/13)   | 40<br>(0/5)   | 560<br>(0/27)  | 192<br>(0/23) | 130<br>(0/21) | 620<br>(0/31) | 194<br>(0/32) | 52<br>(0/8)   | 42<br>(2/4)    | 23   |              | 2,910<br>(2/242)  |
|                  | Farm            |                                                                                       | 73            | 10            | 90             |                |               |                | 90<br>(0/1)   |               |               |               |               |                |      |              | 263<br>(0/1)      |
| Hebei            | Poultry market  | 70<br>(8/8)                                                                           | 4             | 40<br>(2/2)   | 40<br>(0/1)    |                |               | 127<br>(0/4)   | 50<br>(0/2)   |               | 359<br>(6/20) | 53<br>(0/2)   | 40<br>(0/1)   |                |      |              | 783<br>(16/40)    |
|                  | Farm            | 280                                                                                   |               |               | 40             | 180            |               | 351<br>(0/1)   |               | 4             |               |               |               |                |      |              | 855<br>(0/1)      |
|                  | Slaughter-house |                                                                                       |               |               | 350            |                | 50            | 30             | 60<br>(0/1)   | 20<br>(0/1)   | 100<br>(0/1)  |               |               |                |      |              | 610<br>(0/3)      |
| Henan            | Poultry         | 60                                                                                    |               | 20            | 150            |                |               | 256            | 13            | 15            | 370           | 5             | 69            |                |      |              | 958               |



|          |                 |               |             |             |              |              |             |               |               |             |               |               |             |    |  |    |                  |
|----------|-----------------|---------------|-------------|-------------|--------------|--------------|-------------|---------------|---------------|-------------|---------------|---------------|-------------|----|--|----|------------------|
|          | Slaughter-house |               |             |             | 90<br>(0/2)  |              | 30<br>(0/1) | 30            |               |             | 30            |               | 11          |    |  |    | 191<br>(0/3)     |
| Qinghai  | Poultry market  |               |             |             | 384<br>(0/8) | 25<br>(0/4)  | 69<br>(1/1) | 589<br>(0/17) | 22            | 10<br>(0/2) | 249<br>(0/3)  |               |             |    |  |    | 1348<br>(1/35)   |
|          | Farm            |               |             |             | 185<br>(0/2) |              | 40          |               |               |             | 410<br>(0/1)  |               |             |    |  |    | 635<br>(0/3)     |
| Shanxi   | Farm            | 510<br>(0/1)  |             |             | 1200         |              |             | 1012<br>(0/1) |               | 8           | 1020          |               |             |    |  |    | 3,750<br>(0/2)   |
| Shandong | Poultry market  | 155<br>(0/5)  | 3           | 98<br>(0/2) | 30           |              | 3           | 255<br>(0/5)  | 14<br>(0/1)   | 45<br>(0/1) | 240<br>(0/5)  | 40<br>(0/1)   |             |    |  |    | 883<br>(0/20)    |
|          | Farm            | 240           |             |             | 339          | 639<br>(0/2) | 67<br>(0/1) | 630<br>(0/6)  | 90<br>(0/2)   | 20<br>(0/1) | 215           | 160           | 10          |    |  |    | 2,410<br>(0/12)  |
|          | Slaughter-house |               |             |             |              |              |             | 30            | 30            | 20          | 75<br>(0/1)   | 20            |             |    |  |    | 175<br>(0/1)     |
| Shanghai | Poultry market  | 190<br>(0/12) | 10          |             |              |              |             | 150<br>(2/12) | 30<br>(2/2)   | 30<br>(2/7) | 370<br>(0/3)  |               | 30<br>(1/4) |    |  |    | 810<br>(7/40)    |
|          | Farm            |               |             |             |              |              |             | 180           |               |             |               |               |             |    |  |    | 180              |
| Sichuan  | Poultry market  |               |             |             |              |              |             | 269<br>(0/8)  | 177<br>(0/14) | 28<br>(0/4) | 517<br>(0/33) | 282<br>(0/36) | 30<br>(0/5) |    |  |    | 1,303<br>(0/100) |
|          | Farm            |               |             |             | 37           | 22           | 12          | 40            | 120           | 15          |               |               |             |    |  |    | 246              |
|          | Slaughter-house |               |             |             |              |              |             |               | 30<br>(0/2)   |             |               |               |             |    |  |    | 30<br>(0/2)      |
| Tibet    | Poultry market  |               |             |             | 220<br>(0/9) | 95<br>(0/7)  | 60<br>(0/6) | 153           | 76<br>(0/2)   | 40<br>(0/1) | 186<br>(0/8)  | 160<br>(0/13) | 95<br>(0/7) |    |  |    | 1,085<br>(0/53)  |
|          | Farm            |               |             |             | 170          | 50           |             | 320<br>(0/1)  | 16            | 10          | 40            |               | 10          |    |  |    | 616<br>(0/1)     |
| Xinjiang | Poultry market  | 151<br>(0/17) | 44<br>(0/5) | 50<br>(0/4) | 220<br>(2/6) | 23<br>(0/1)  | 31<br>(2/2) | 286<br>(0/12) | 59<br>(0/2)   | 49<br>(0/2) | 390<br>(0/7)  | 27<br>(0/2)   | 60<br>(0/4) |    |  |    | 1,390<br>(4/64)  |
|          | Farm            | 126           | 95<br>(0/1) | 20          | 350<br>(0/1) |              | 10          | 120<br>(0/7)  | 20<br>(0/2)   | 5           | 120           | 30            |             |    |  |    | 896<br>(0/11)    |
|          | Slaughter house | 95            | 15          |             | 111          |              | 30          | 96<br>(0/1)   |               | 10          |               |               | 30<br>(0/1) |    |  |    | 387<br>(0/2)     |
| Yunnan   | Poultry market  |               |             |             | 560<br>(0/9) | 60<br>(0/6)  | 60<br>(0/7) | 660<br>(0/18) | 162<br>(0/12) | 90<br>(0/4) | 892<br>(0/31) | 179<br>(0/11) | 45<br>(0/1) |    |  |    | 2,708<br>(0/99)  |
|          | Farm            |               |             |             | 60           |              | 10          |               |               |             |               |               |             |    |  |    | 70               |
| Zhejiang | Poultry         | 185           | 116         | 145         | 243          | 57           | 170         | 250           | 116           | 34          | 480           | 284           | 68          | 60 |  | 50 | 2,258            |

|       |        |                   |                 |                  |                    |                   |                  |                    |                    |                   |                    |                  |                  |                |             |             |                      |
|-------|--------|-------------------|-----------------|------------------|--------------------|-------------------|------------------|--------------------|--------------------|-------------------|--------------------|------------------|------------------|----------------|-------------|-------------|----------------------|
|       | market | (12/14)           | (0/1)           | (6/10)           | (6/27)             | (1/11)            | (1/18)           | (2/8)              | (2/19)             | (1/4)             | (11/28)            | (2/34)           | (3/10)           | (1/4)          |             | (3/7)       | (51/195)             |
|       | Farm   |                   |                 |                  | 270                | 360<br>(0/8)      | 100<br>(0/4)     |                    | 840<br>(0/11)      |                   | 30<br>(1/1)        |                  |                  |                |             |             | 1600<br>(1/24)       |
| Total |        | 5,891<br>(24/191) | 4508<br>(0/126) | 2,282<br>(8/117) | 14,953<br>(45/291) | 11,100<br>(6/372) | 3,872<br>(7/168) | 15,049<br>(69/411) | 10,217<br>(12/469) | 2,393<br>(10/209) | 15,276<br>(58/424) | 9,296<br>(6/493) | 2,478<br>(8/156) | 822<br>(36/68) | 33<br>(1/2) | 70<br>(3/7) | 98,240<br>(293/3504) |

<sup>a</sup>In total, 112,593 samples were collected. We isolated 138 viruses from 2,656 goose samples, 22 viruses from 1,347 pigeon samples, but no viruses from the 10,350 wild bird feces. Because H7N9 virus was not isolated from the latter samples, we did not include information about these samples in the table.
