# Supplementary material for: H7N9 virulent mutants detected in chickens in China pose an increased threat to humans
Source: PubMed Central journal article supplement (PMC5717404; doi:10.1038/cr.2017.129), 2017-10-24
Supplement: cr2017129x8.pdf [file cr2017129x8.pdf]

**Table S2. Amino acids at positions 627 and 701 of the PB2 gene of viruses recovered from the organs of ferrets that were inoculated with the CK/SD008 virus<sup>a</sup>.**

| Animal   | Key amino acids in PB2 | Viral samples recovered from different organs of ferrets |                 |           |        |        |            |        |        |       |
|----------|------------------------|----------------------------------------------------------|-----------------|-----------|--------|--------|------------|--------|--------|-------|
|          |                        | Tonsil                                                   | Nasal turbinate | Left lung |        |        | Right lung |        |        | Brain |
|          |                        |                                                          |                 | Cranial   | Middle | Caudal | Cranial    | Middle | Caudal |       |
| Ferret 1 | 627K                   | 0/10                                                     | 2/10            | 0/10      | 8/10   | 1/10   | 1/10       | 0/10   | 4/10   | 0/10  |
|          | 701N                   | 5/10                                                     | 0/10            | 0/10      | 1/10   | 0/10   | 0/10       | 8/10   | 0/10   | 0/10  |
| Ferret 2 | 627K                   | 1/10                                                     | 3/10            | 2/10      | 0/10   | 3/10   | 1/10       | 0/10   | 0/10   | 0/10  |
|          | 701N                   | 0/10                                                     | 1/10            | 0/10      | 4/10   | 0/10   | 0/10       | 3/10   | 0/10   | 0/10  |

<sup>a</sup>Viral RNAs were extracted from the organs of virus-inoculated ferrets. A 500-nucleotide PB2 fragment covering codons 627 to 701 was amplified and cloned into T vectors. Ten molecular clones from each sample were randomly selected and sequenced. The number on the left of the slash shows the number of clones bearing the indicated amino acid at position of PB2, and the number on the right of the slash shows the total number of clones sequenced.
