# Supplementary material for: H7N9 virulent mutants detected in chickens in China pose an increased threat to humans
Source: PubMed Central journal article supplement (PMC5717404; doi:10.1038/cr.2017.129), 2017-10-24
Supplement: cr2017129x10.pdf [file cr2017129x10.pdf]

**Table S4. Samples collected from Guangdong province in February 2017 and tested for H7N9 influenza viruses.**

| Sampling site (numbers) | Species     | Total samples collected | H7N9 viruses isolated | No. of viruses with insertions in HA/Total <sup>a</sup> |
|-------------------------|-------------|-------------------------|-----------------------|---------------------------------------------------------|
| Poultry market (30)     | Chicken     | 855                     | 20                    | 10/21                                                   |
|                         | Duck        | 113                     | 0                     | /                                                       |
|                         | Goose       | 30                      | 0                     | /                                                       |
|                         | Environment | 152                     | 7                     | 5/7                                                     |
| Farm (60)               | Chicken     | 1800                    | 1                     | 0/1                                                     |
| Total                   | /           | 2950                    | 28                    | 15/28                                                   |

<sup>a</sup>The results were obtained from the partial sequence of the HA gene of the viruses.
